# Supplementary material for: LncRNA MIR4435-2HG targets desmoplakin and promotes growth and metastasis of gastric cancer by activating Wnt/β-catenin signaling
Source: publisher site journal article supplement (doi:10.18632/aging.102164), 2019-09-04
Supplement: Supplementary file [file aging-v11i17-102164-supplementary-material-SD2.pdf]

## SUPPLEMENTARY FIGURES

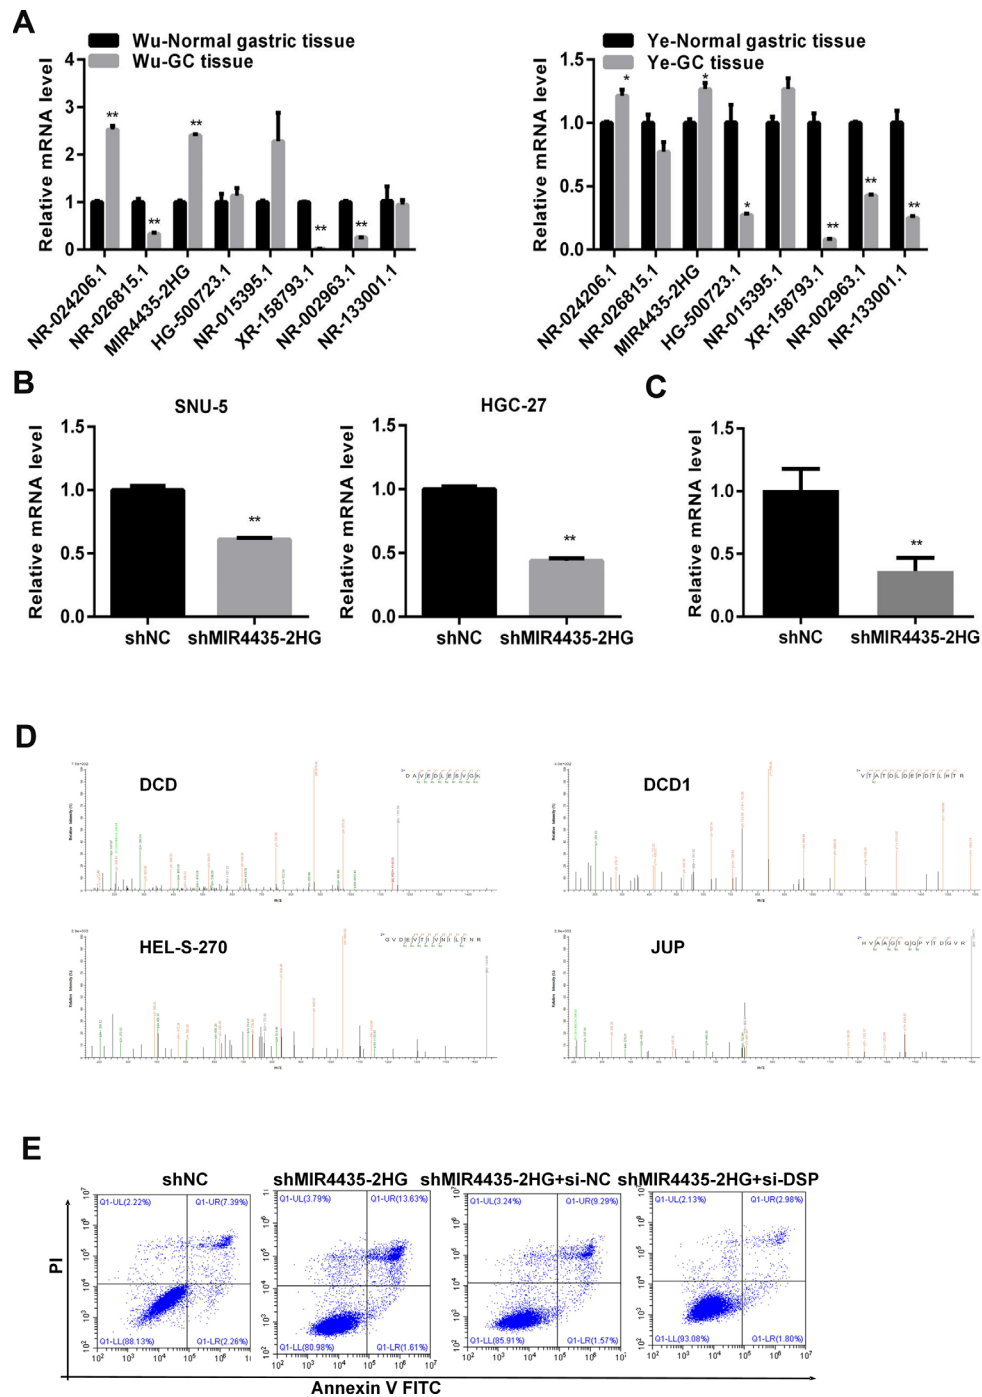

**Supplementary Figure 1.** (A) Validation of the differential expression of 8 lncRNAs in Wu and Ye cancer tissues and paired normal gastric tissues using RT-qPCR ( $*P < 0.05$ ,  $**P < 0.01$ ) respectively. (B) SNU5 and HGC-27 cells were transfected with MIR4435-2HG-specific shRNA (shMIR4435-2HG), respectively. The level of MIR4435-2HG in SNU5 or HGC-27 cells was detected with qRT-PCR. (C) HGC-27 cells stably transfected with sh-MIR4435 were inoculated into nude mice. The level of MIR4435-2HG in tumor tissues was detected with qRT-PCR *in vivo*. (D) The biotinylated sense MIR4435-2HG band was excised, digested, and subjected to mass spectrometry, which identified DCD, DCD1, HEL-S-270, and JUP as the MIR4435-2HG-interacting proteins. (E) The incidence of apoptosis among HGC-27 cells co-transfected with shMIR4435-2HG and si-DSP was determined using flow cytometry ( $**P < 0.01$ ).

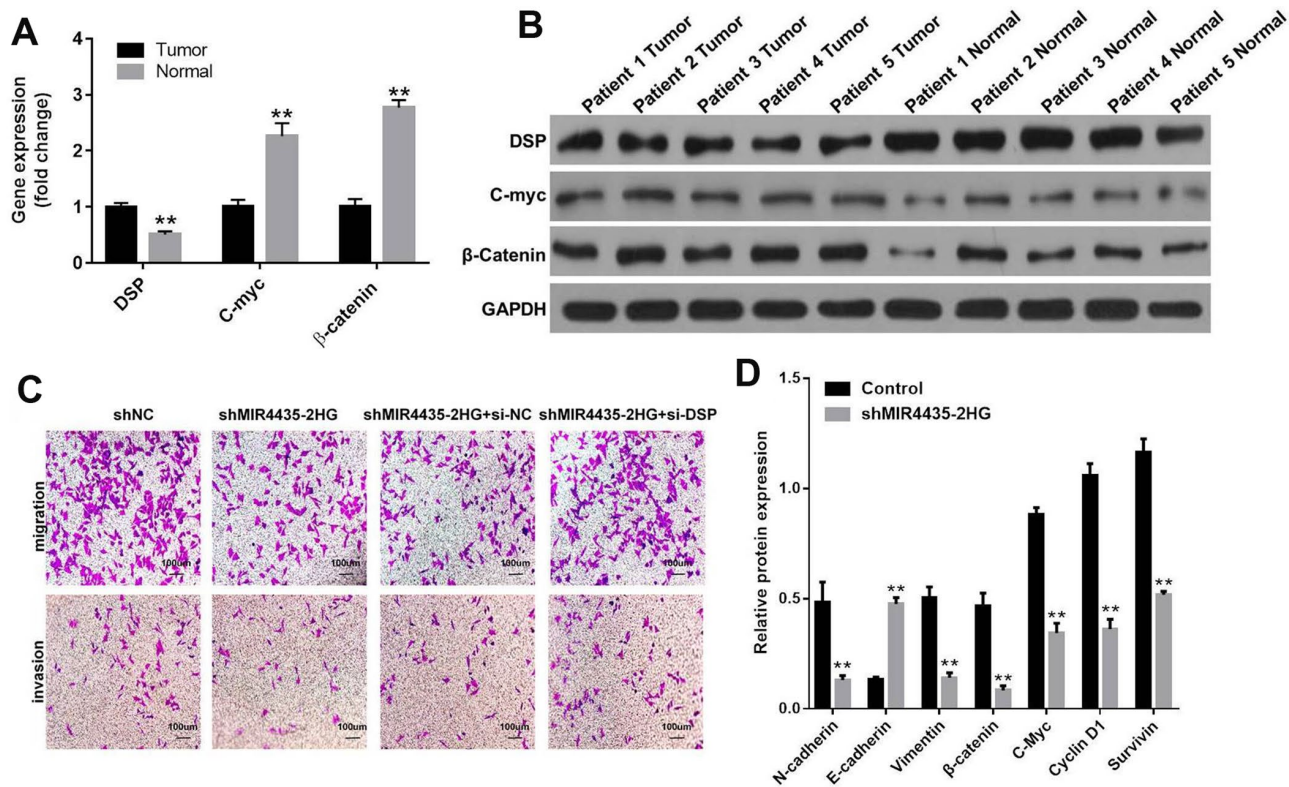

**Supplementary Figure 2.** (A, B) The expressions of DSP, c-myc and β-catenin in 5 GC samples and 5 adjacent normal gastric samples were detected using with qRT-PCR and WB. (B) Transwell assays were used to assess cell migration and invasion in the group co-transfected with shMIR4435-2HG and si-DSP (\*\* $P < 0.01$ ). The migratory and invasive cells were observed with a light microscope. (C) Levels of N-cadherin, E-cadherin, vimentin, β-catenin, c-Myc, cyclin D1 and survivin within tumor tissue were determined using western blot. The relative expressions of N-cadherin, E-cadherin, vimentin, β-catenin, c-Myc, cyclin D1 and survivin were quantified via normalization to GAPDH. \*\* $P < 0.01$  vs. shNC group.
